# Supplementary material for: Endothelial Autocrine Signaling through CXCL12/CXCR4/FoxM1 Axis Contributes to Severe Pulmonary Arterial Hypertension
Source: MDPI journal article supplement (doi:10.3390/ijms22063182), 2021-03-20
Supplement: s1 [file s1]

## SUPPLEMENTAL MATERIALS

### Endothelial Autocrine Signaling through CXCL12/CXCR4/FoxM1 Axis Contributes to Severe Pulmonary Arterial Hypertension

Dan Yi, Bin Liu, Ting Wang, Qi Liao, Maggie M. Zhu, You-Yang Zhao and Zhiyu Dai

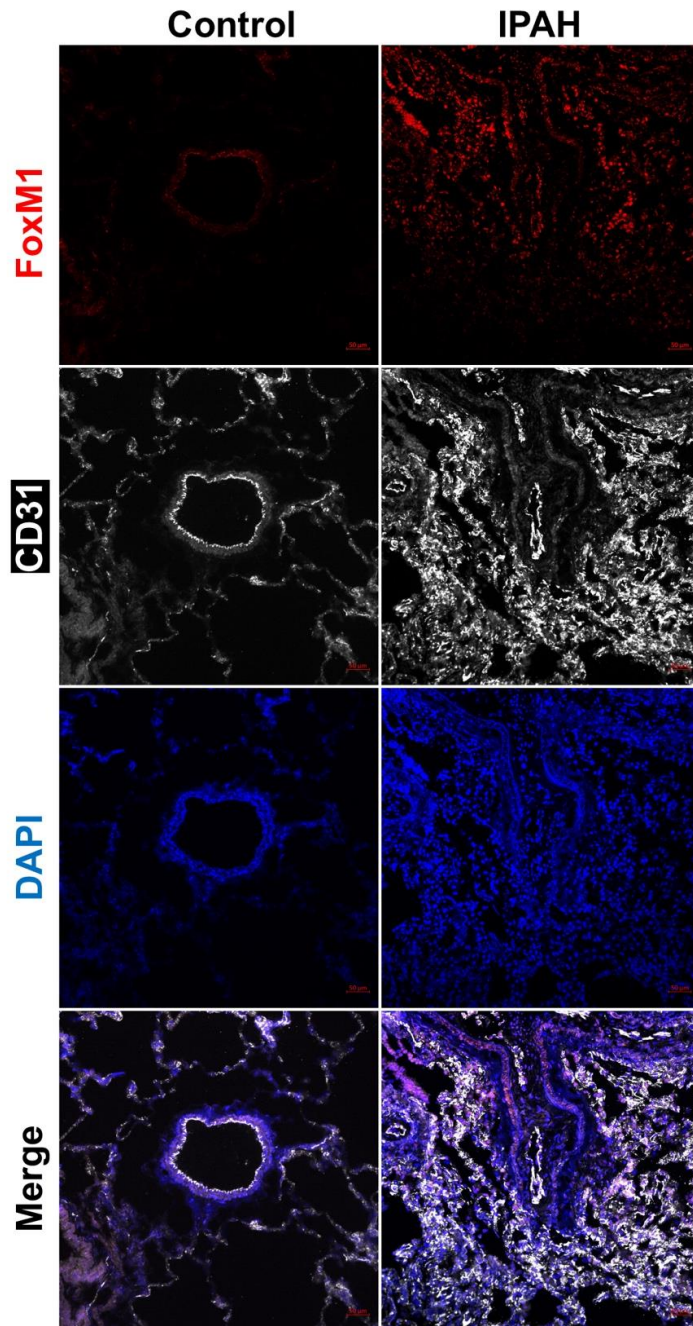

**Supplemental Figure S1.** Representative images of immunostaining against FoxM1 in lower magnification. Immunostaining against FoxM1 demonstrated that FoxM1 is highly expressed and induced in the lung of IPAH patients compared with failed donors (Control). Scale bar = 50  $\mu\text{m}$ .

**Supplemental Table S1.** Clinical and demographic characteristics of PAH patients and control.

| ID          | PAH or Failed Donor | Gender | Race  | Ethnicity    | Age | WHO Functional Class | 6MWD (m) | mPAP (mmHg) | CO (mL/min) | PVR (WU) | Treatment                                        |
|-------------|---------------------|--------|-------|--------------|-----|----------------------|----------|-------------|-------------|----------|--------------------------------------------------|
| PHBI-ST-036 | IPAH                | Female | White | Non-Hispanic | 11  | No data              | 243.8    | 95          | No data     | No data  | Sildenafil/Ambrisentan/Epoprostenol/Treprostinil |
| PHBI-ST-042 | IPAH                | Male   | White | Non-Hispanic | 53  | IV                   | 77.7     | 45          | 4.28        | 8.18     | Tadalafil/Epoprostenol/Sildenafil/Macitentan     |
| PHBI-UA-026 | IPAH                | Female | White | Non-Hispanic | 55  | II                   | 381      | 52          | 5.59        | 7.33     | Treprostinil/Ambrisentan/Tadalafil               |
| PHBI-AH-022 | Failed donor        | Female | White | Non-Hispanic | 57  | N/A                  | N/A      | N/A         | N/A         | N/A      | N/A                                              |
| PHBI-BA-044 | Failed donor        | Male   | White | Non-Hispanic | 30  | N/A                  | N/A      | N/A         | N/A         | N/A      | N/A                                              |
| PHBI-BA-059 | Failed donor        | Female | Asian | Non-Hispanic | 34  | N/A                  | N/A      | N/A         | N/A         | N/A      | N/A                                              |

**Supplemental Table S2.** Primer sequences for QRT-PCR analysis.

| Gene name           | Forward primer         | Reverse primer           |
|---------------------|------------------------|--------------------------|
| <i>hFOXM1</i>       | GGAGGAAATGCCACACTTAGCG | TAGGACTTCTTGGGTCTTGGGGTG |
| <i>h18S rRNA</i>    | TTCCGACCATAAACGATGCCGA | GACTTTGGTTTCCCGGAAGCTG   |
| <i>mFoxm1</i>       | CACTTGGATTGAGGACCACTT  | GTCGTTTCTGCTGTGATTCC     |
| <i>mCyclophilin</i> | GGCAAATGCTGGACCAAACAC  | TTCTTGACCCAAAACGCTC      |
